# Supplementary material for: Laser irradiation durability of photorefractive ferroelectric liquid crystal blends containing terthiophene photoconductive chiral dopants
Source: Royal Society of Chemistry journal article supplement (doi:10.1039/c6ra12231k), 2016-01-01
Supplement: c6ra12231k1.pdf [file c6ra12231k1.pdf]

# Laser irradiation durability of photorefractive ferroelectric liquid crystal blends containing terthiophene photoconductive chiral dopants

Takeo Sasaki,<sup>\*a</sup> Masanori Yoshino,<sup>a</sup> Yumiko Naka,<sup>a</sup> Khoa V. Le,<sup>a</sup> and Takafumi Sassa<sup>b</sup>

<sup>a</sup>Department of Chemistry, Faculty of Science, Tokyo University of Science, 1-3 Kagurazaka, Shinjuku-ku, Tokyo 162-8601, Japan. E-mail: sasaki@rs.kagu.tus.ac.jp

<sup>b</sup>Advanced Device Laboratory, RIKEN (The Institute of Physical and Chemical Research), Cooperation Center, South Area, 2-1 Hirosawa, Wako, Saitama 351-0198, Japan

## Supplementary Information

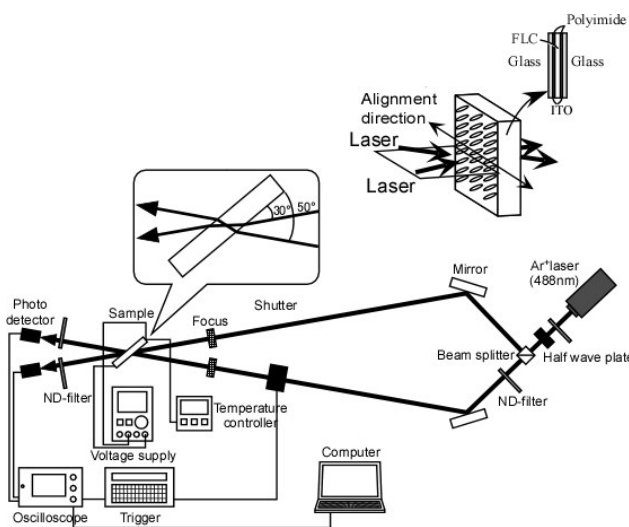

**Figure S1.** Schematic illustration of the beam incidence condition in the two-beam coupling experiment. A linearly polarized beam from a DPSS laser (Cyan Model PC13589, Spectra-Physics; 488 nm, continuous wave) was divided in two by a beam splitter, which were then interfered in the sample film. A p-polarized beam was used in most of the experiments in this study. The laser intensity was 2.5 mW for each beam (1 mm diameter). The incident beam angles to the glass plane were 30° and 50°. Each interval of the interference fringe was 1.87  $\mu\text{m}$ . An electric field of 0 to 10 V/ $\mu\text{m}$  was applied to the sample from a regulated DC power supply (Kenwood DW36-1), and the change in the transmitted beam intensity was monitored by photodiodes (ET-2040, Electro-Optics Technology, Inc.) and recorded by a computer.

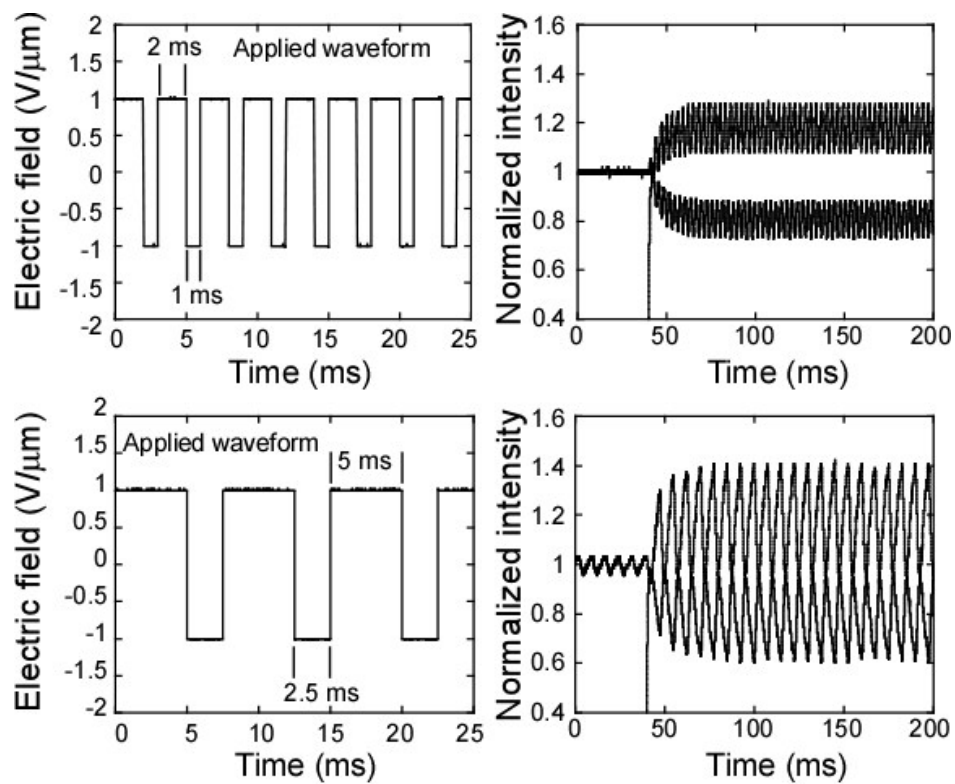

**Figure S2.** Bipolar electric field and two-beam coupling signals obtained from an FLC blend with 6 and 0.1 wt% 3T-2MB and TNF.
